1 **Is Human Bocavirus Infection Associated with Gastroenteritis in Children? An**  
2 **Updated Systematic Review and Meta-analysis**

3 Minyi Zhang<sup>1</sup>, Minyi Liang<sup>1</sup>, Qiushuang Li<sup>1</sup>, Juxian Xian<sup>1</sup>, Fei Wu<sup>1</sup>, Liting Zheng<sup>1</sup>,  
4 Qing Chen<sup>1\*</sup>

5 <sup>1</sup> Guangdong Provincial Key Laboratory of Tropical Disease Research, Department of  
6 Epidemiology, School of Public Health, Southern Medical University, Guangzhou  
7 510515, China

8 **\*Corresponding authors**

9 Qing Chen, Guangdong Provincial Key Laboratory of Tropical Disease Research,  
10 Department of Epidemiology, School of Public Health, Southern Medical University,  
11 Guangzhou 510515, China.  
12 Telephone and fax: +86-020-61648312; email: [qch.2009@163.com](mailto:qch.2009@163.com)

## 14 **Abstract**

15 **Background:** Human bocavirus (HBoV) figures as an increased risk factor of  
16 respiratory and gastrointestinal tract infections among children. A great deal of data is  
17 available to support the pathogenic role of HBoV in acute respiratory diseases.  
18 However, the association between HBoV infection and gastroenteritis remains  
19 controversial due to the ambiguous results. The present work aims to clarify the role of  
20 HBoV as a cause of gastroenteritis in children.

21 **Methodology/Principal findings:** A systematic search of the literature was carried out  
22 from 1 January 2016 to 29 August 2021 in Embase, PubMed, Scopus, Web of Science,  
23 and the Chinese bibliographic database of biomedicine (CBM). Data from included  
24 studies were analyzed by use of a random-effects model. The pooled estimates of HBoV  
25 prevalence among all cases of gastroenteritis were generated and stratified by potential  
26 confounders. The pooled odds ratio (OR) and 95% confidence interval (CI) were  
27 computed for HBoV infection in relation to the risk of gastroenteritis. The overall  
28 prevalence of HBoV in children with gastroenteritis (9.1%, 95% CI: 6.7-11.8%) was  
29 considerably higher than that detected in children without gastroenteritis (4.0%, 95%  
30 CI: 1.1-8.5%). HBoV prevalence tended to be higher in cases of gastroenteritis under  
31 five years of age (12.1%, 95% CI: 6.8-18.7%). The highest frequency of HBoV was  
32 found in Egypt (57.8%, 95% CI: 47.7-67.6%). The predominant genotypes of HBoV  
33 circulating in children with gastroenteritis were genotype 1 (HBoV1, 3.8%, 95% CI:  
34 2.7-5.2%) and genotype 2 (HBoV2, 2.4%, 95% CI: 1.3-3.7%). HBoV infection was  
35 significantly associated with an increased risk of gastroenteritis in children (OR 1.620,

36 95% CI: 1.023-2.566).

37 **Conclusion:** The HBoV prevalence in pediatric cases of gastroenteritis is higher than  
38 that in children without gastroenteritis, demonstrating an increasing global burden of  
39 gastroenteritis in children caused by HBoV infection. Targeted intervention to reduce  
40 the HBoV burden should be established.

## 43 **Author summary**

44 In addition to the known gastroenteritis-associated pathogens (rotavirus and norovirus  
45 et al.), several novel viruses that might be caused agents of diarrhea have been gradually  
46 determined, such as HBoV. The impact of HBoV infection on the development of  
47 childhood gastroenteritis remains ambiguous and in need of verifications. This work  
48 clarifies the association between HBoV infection and the risk of gastroenteritis in  
49 children based on the review literature. The estimated HBoV prevalence in all cases of  
50 gastroenteritis was categorized into different subgroups following the potential  
51 confounders, including age, gender, country, and HBoV genotypes. The main finding  
52 of this work was the significant association between HBoV infection and the  
53 development of childhood gastroenteritis. Our systematic review highlighted that  
54 HBoV infection contributes to the increased global burden of gastroenteritis in children.

## 55 **Introduction**

56 Childhood Diarrheal disease is a leading cause of malnutrition and death in children  
57 younger than five years, which accounted for roughly 1.7 billion novel cases and greater  
58 than 500 thousand deaths each year throughout the world (1). Infection diarrhea is one  
59 of the most frequent clinical manifestations of gastrointestinal tract infection resulting  
60 from either bacteria, viruses, parasites, or fungi (2). As being preventable, fully  
61 understanding its causative agents would be of vital benefit from substantially  
62 decreasing the burden of diarrheal disease in children. Of these, viruses turn out to be  
63 the primary causative agents responsible for around 70% of gastroenteritis cases in  
64 children (3, 4). For decades, rotavirus was the primary pathogen of gastroenteritis-  
65 related hospitalizations and other severe diseases in the first five years of life (5).  
66 However, the recent wide application of rotavirus vaccines is an essential contributor  
67 to the marked decrease in rotavirus-related illnesses (6, 7). Since then, other novel  
68 detected viral pathogens have become the potential risk factors of childhood  
69 gastroenteritis, such as human bocavirus (HBoV).

70 HBoV consists of ~5kb linear and small non-enveloped single-stranded DNA  
71 genome organizing in three open reading frames that encode two forms of non-  
72 structural protein 1 (NS1), a nuclear phosphoprotein (NP1), and two viral capsid  
73 proteins (VP1 and VP2) (8-10). Following the genomic analysis, HBoV belongs to the  
74 genus *Bocavirus* within the family *Parvoviridae* and the subfamily *Parvovirinae*, with  
75 four currently identified genotypes. HBoV genotype 1 (HBoV1) was firstly discovered  
76 in nasopharyngeal aspirates from children with respiratory tract infections (5). With its

77 initial discovery in 2005 by Tobias Allander and colleagues (5), numerous studies  
78 regarding the epidemiology, pathogenesis, diagnosis, and clinical features of this virus  
79 have been carried out in many countries. Subsequently, three additional genotypes were  
80 detected in feces and named HBoV2, 3, and 4 (11, 12). A great deal of data is available  
81 to support the association between HBoV1 infection and acute respiratory diseases,  
82 such as asthma, pneumonia, bronchiolitis, and acute wheezing (13-17). On the contrary,  
83 the remaining genotypes are primarily identified in human specimens. Previous studies  
84 have suggested a comparable prevalence of HBoV in patients with gastroenteritis  
85 compared to healthy or non-diarrheal individuals (11, 18). For instance, a prior study  
86 involving 632 children with gastroenteritis and 162 healthy controls has shown a  
87 statistically significant association between HBoV infection and childhood  
88 gastroenteritis (18). It should be noted that, in the same study, the majority of HBoV  
89 infections were found in children less than 12 months of age (18). Most recently,  
90 Neveen et al. concluded that HBoV could be the significant etiologic agent of  
91 gastroenteritis due to the presence of HBoV in some children suffering from diarrheal  
92 disease without any association of any other etiological agents (19). However, a  
93 controversial issue that arises in this domain is the actual pathogen role of HBoV in  
94 gastrointestinal symptoms due to the growing appears of HBoV detection in  
95 asymptomatic patients (20, 21).

96 A systematic review and meta-analysis have been published to assess whether HBoV  
97 infection is a risk factor for gastroenteritis in children under five years (22). This review  
98 included 36 unique studies from 18 countries between Oct. 2005 and Oct. 2016 and

99 estimated that 6.90% of all cases of gastroenteritis in children younger than five years  
100 were correlated with HBoV infection. However, this review failed to identify a  
101 statistically significant association of HBoV infection with the risk of gastroenteritis.  
102 Also, the prevalence and distribution of HBoV3 and HBoV4 are needed to be  
103 established due to the lack of pooled estimations.

104 With the increasing use of molecular diagnostics and much attention of scientists,  
105 the data on different genotypes of HBoV associated with gastroenteritis in children has  
106 increased in the last five years and accordingly prompted us to update previous  
107 estimates of HBoV prevalence and genotype distribution in pediatric cases of  
108 gastroenteritis up to 29 August 2021. Additionally, the second aim of this work was to  
109 determine the association between HBoV infection and gastroenteritis in children  
110 through a meta-analytic method.

## 111 **Methods**

### 112 **Data sources**

113 Following the Preferred Reporting Items for Systematic Review and Meta-Analyses  
114 (PRISMA) statement (23), a comprehensive literature search was conducted in Embase,  
115 PubMed, Scopus, Web of Science, and CBM (Chinese bibliographic database of  
116 biomedicine) databases for identifying eligible records from 1 January 2016 to 29  
117 August 2021. The Medical Subject Heading (MeSH) terms “human bocavirus”,  
118 “gastroenteritis”, “diarrhea”, “child”, and related terms were used in all possible  
119 combinations. More detailed search strategies in each database are showed in S1 Table.  
120 Since fewer studies in a case-control design were identified during the present time

121 horizon of the literature search, we additionally included the case-control studies from  
122 a previous systematic by Ri De and colleagues (22) and extracted data for other  
123 variables as required.

## 124 **Study selection**

125 Studies that met the following criteria were deemed eligible for inclusion: 1) enrolled  
126 pediatric patients with gastroenteritis or healthy children; 2) applied PCR-based  
127 diagnostics for HBoV on fecal samples; 3) original cross-sectional or case-control  
128 documents of HBoV infection. The exclusion criteria were the following: 1) duplicate  
129 records; 2) HBoV prevalence in adults; 3) samples other than stools; 4) HBoV infection  
130 employing antigen assays and studies that reported seroprevalence of HBoV antibodies;  
131 5) lack of detailed data; 6) animal studies, conference abstracts, reviews, letters, case  
132 reports, or obviously irrelevant.

## 133 **Data extraction**

134 Two researchers independently reviewed and selected all potentially relevant articles  
135 following the inclusion and exclusion criteria for further assessment. Suppose any  
136 conflicts exist between the investigators, a third evaluator will make a final decision.  
137 The following information was extracted from the included publications by two  
138 researchers: first author, year of publication, country, study period, study design, used  
139 diagnostic method, age range or mean, gender, sample size, number of total cases,  
140 number of HBoV-positive cases, number of total controls, number of HBoV-positive  
141 controls, and genotypes of HBoV.

## 142 **Assessment of Study Quality**



143 Two investigators independently assessed the quality of each retrieved study in a case-  
144 control design through the Newcastle-Ottawa Scale (NOS) (24). A study was awarded  
145 a maximum of one star for each numbered item within the selection and exposure  
146 sections. A maximum of two stars was awarded regarding the comparability category.  
147 Studies that received seven or more out of a maximum of 9 stars were judged as being  
148 of high quality. Meanwhile, medium-quality and poor-quality studies were considered  
149 those with four to six stars and those with fewer than four stars, respectively.

## 150 **Statistical analysis**

151 Using the HBoV prevalence as the primary outcome, we firstly generated pooled  
152 estimated prevalence of HBoV infection in all pediatric patients with gastroenteritis.  
153 Further, a meta-analysis of risk effect estimates was carried out regarding the HBoV  
154 exposure and gastroenteritis in children by the DerSimonian and Laird random-effects  
155 model (25). Pooled estimates of odds ratios (ORs) and 95% confidence interval (CIs)  
156 were computed. The  $I^2$  statistic was utilized to measure the proportion of the total  
157 variability explained by heterogeneity across studies.  $I^2$  values  $< 25\%$  indicate a low  
158 level of heterogeneity, whereas  $I^2$  values  $\geq 75\%$  is regarded as a high degree of  
159 heterogeneity (26). Cochran's  $Q$  statistic was applied to examine the statistical  
160 significance of the heterogeneity. We stratified the pediatric patients based on age,  
161 gender, country, and HBoV genotype and subsequently calculated the summary risk of  
162 gastroenteritis for HBoV infection. A Pearson's chi-square test was employed to  
163 identify the significant difference between the subgroups. Additionally, we addressed  
164 whether the distribution of HBoV infection varied between pediatric cases of

165 gastroenteritis and healthy children.

166 Publication bias was assessed by combining the funnel plot, Begg's adjusted rank  
167 correlation test, and Egger's regression asymmetry test (27, 28). All statistical analyses  
168 were conducted in Stata 16. A probability level less than 0.05 was considered  
169 statistically significant except the heterogeneity test set at less than 0.1, and all  
170 statistical tests were two-sided.

## 171 **Results**

### 172 **Literature search**

173 Based on the search strategy, seven hundred and seventy-three relevant articles were  
174 initially retrieved from Embase, PubMed, Scopus, Web of Science, and CBM, of which  
175 266 were finally identified between 2016 and 2021. One hundred and twenty-seven  
176 documents were subsequently removed due to duplication, and a total of 222 records  
177 were excluded after manual screening of titles and abstracts. The remaining 44 full-text  
178 articles were further obtained for eligibility, of which 29 unique studies were included  
179 after applying the inclusion and exclusion criteria in this systematic review and meta-  
180 analysis. Case-control studies originally identified by Ri De and colleagues were  
181 appended to our search. However, two of the ten studies were excluded due to reporting  
182 HBoV prevalence either in serum samples or in adults. Also, one study not published  
183 in original research was removed, leaving seven additional studies in a case-control  
184 design. Consequently, the present updated review consisted of 36 studies. A PRISMA-  
185 based flowchart of the literature search and study selection is depicted in Fig 1.

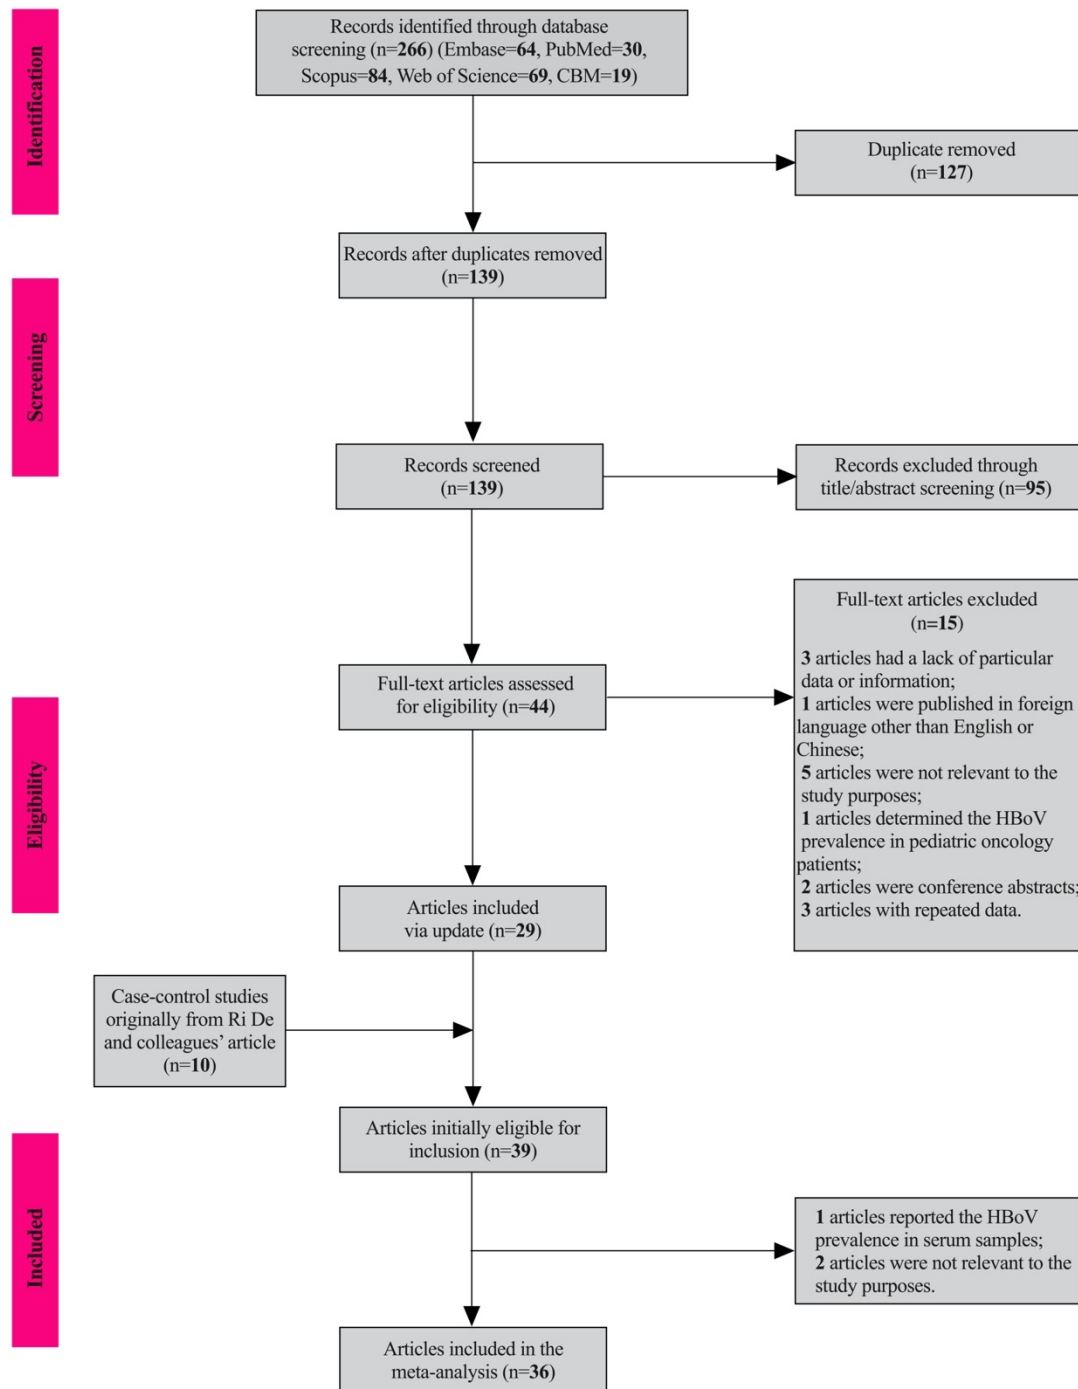

186

187 **Fig 1. Flowchart of the literature search and study selection**

188 **Study characteristics**

189 The final dataset included data on children from 20 countries (Russia, United States,  
 190 India, China, Brazil, Albania, Korea, Japan, Sudan, Gabon, Latvia, Iraq, Iran, South  
 191 Africa, Bangladesh, Australia, Finland, United Kingdom, Thailand, and Egypt). Of the

192 36 included documents, 11 were case-control (11, 18, 29-37) and 25 were cross-  
193 sectional in study design (20, 38-61). Amidst the cross-sectional studies, 23 were case-  
194 only, and the remaining 2 presented data for healthy individuals. The largest study  
195 investigated 5250 pediatric patients with gastroenteritis in Russia, and the smallest one  
196 comprised 83 cases. This review consisted of 15 and 29 studies reporting gender and  
197 genotype distribution of HBoV infection, respectively. The majority of these data  
198 represented children less than five years of age (n=20). Most studies were carried out  
199 in China (n=8), followed by Brazil (n=4) and Bangladesh (n=3). The characteristics of  
200 cross-sectional and case-control studies are summarized in Table 1 and 2.

201 **Table 1 Summary of characteristics of cross-sectional studies**

| <b>First author</b>         | <b>Year</b> | <b>Country</b> | <b>Study period</b>   | <b>Age range/ mean</b> | <b>Number of HBoV positive</b> | <b>Total</b> |
|-----------------------------|-------------|----------------|-----------------------|------------------------|--------------------------------|--------------|
| <b>With gastroenteritis</b> |             |                |                       |                        |                                |              |
| Gubio Soares Campos         | 2016        | Brazil         | Jan. 2012-July 2012   | ≤ 5 years              | 44                             | 105          |
| G. La Rosa                  | 2016        | Albania        | Oct. 2013-Jan. 2015   | 2 months-7 years       | 13                             | 142          |
| Eun Jin Lee                 | 2016        | Korea          | Feb. 2015-May 2015    | ≤ 6 years              | 10                             | 155          |
| Min Zhao                    | 2016        | China          | Oct. 2010-Dec. 2012   | NA                     | 25                             | 1121         |
| Neha Lasure (1)             | 2017        | India          | Jan. 2009-Dec. 2011   | ≤ 5 years              | 24                             | 418          |
| Naoki Shigemoto             | 2017        | Japan          | Jan. 2006-Dec. 2013   | 0-14 years             | 10                             | 312          |
| Tao Zhou                    | 2017        | China          | Jan. 2012-Dec. 2013   | ≤ 6 years              | 60                             | 346          |
| Mosab A. Adam               | 2018        | Sudan          | April-Dec. 2014       | ≤ 5 years              | 5                              | 437          |
| Sonia Etenna Lekana-Douki   | 2018        | Gabon          | March 2010-June 2011  | ≤ 5 years              | 7                              | 317          |
| Zaiga Nora-Krukle           | 2018        | Latvia         | Nov. 2013-April 2017  | ≤ 5 years              | 21                             | 83           |
| Luana S. Soares             | 2019        | Brazil         | Nov. 2011-Nov. 2012   | ≤ 10 years             | 54                             | 225          |
| Ghasaq Mundher Ali          | 2020        | Iraq           | July 2019-March 2020  | ≤ 5 years              | 9                              | 100          |
| Gyu Ri Kim                  | 2020        | Korea          | July 2016-July 2017   | < 5 years              | 2                              | 740          |
| Marco Yung-Cheng Lin        | 2020        | China          | Sep. 2013-June 2015   | NA                     | 15                             | 176          |
| Fábio Correia Malta         | 2020        | Brazil         | Jan. 2016-Dec. 2017   | ≤ 2 years              | 110                            | 886          |
| Mehrdad Mohammadi           | 2020        | Iran           | 2017-2018             | ≤ 3 years              | 72                             | 500          |
| Rembuluwani Netshikweta     | 2020        | South Africa   | April 2009-April 2015 | ≤ 5 years              | 212                            | 3765         |

|                                |      |              |                     |               |     |      |
|--------------------------------|------|--------------|---------------------|---------------|-----|------|
| Mpumelelo Casper Rikhotso      | 2020 | South Africa | June 2017-July 2018 | ≤ 5 years     | 8   | 141  |
| Nadim Sharif (1)               | 2020 | Bangladesh   | Jan. 2014-Jan. 2019 | ≤ 15 years    | 19  | 387  |
| Nadim Sharif (2)               | 2020 | Bangladesh   | Jan. 2015-Jan. 2019 | ≤ 15 years    | 21  | 290  |
| Nattika Nantachit              | 2021 | Tailand      | Jan. 2012-Dec. 2018 | ≤ 5 years     | 141 | 2727 |
| Neveen M. Rizk                 | 2021 | Egypt        | NA                  | ≤ 5 years     | 59  | 102  |
| JI Yan-li                      | 2017 | China        | Jan.-Dec. 2016      | < 60 months   | 26  | 354  |
| <b>Without gastroenteritis</b> |      |              |                     |               |     |      |
| Teresinha Teixeira de Sousa    | 2017 | Brazil       | 2014-2015           | ≤ 5 years     | 1   | 119  |
| Shoko Okitsu                   | 2020 | Bangladesh   | June-Oct. 2016      | 73 ± 4 months | 1   | 227  |

202 NA, Not available

204 **Table 2 Summary of case-control studies**

| First author                        | Year | Country        | Study period            | Sample size | Age range/<br>mean     | Number of<br>HBoV positive | Total | Age range/<br>mean     | Number of<br>HBoV positive | Total |
|-------------------------------------|------|----------------|-------------------------|-------------|------------------------|----------------------------|-------|------------------------|----------------------------|-------|
| Alexander Tymentsev                 | 2016 | Russia         | Feb 2010-Dec 2012       | 5502        | ≤ 5 years              | 62                         | 5250  | ≤ 5 years              | 1                          | 252   |
| Rimma Melamed                       | 2017 | Unite States   | Nov 2003-Nov 2005       | 356         | 44.8 (11-60)<br>months | 22                         | 178   | 43.8 (11-59)<br>months | 14                         | 178   |
| Neha Lasure (2)                     | 2019 | India          | 2007-2011               | 985         | ≤ 5 years              | 46                         | 778   | ≤ 5 years              | 0                          | 207   |
| Ri De                               | 2018 | China          | May-Dec 2016            | 480         | ≤ 5 years              | 18                         | 240   | ≤ 5 years              | 12                         | 240   |
| Jane L. Arthur <sup>a</sup>         | 2009 | Australia      | Jan-Dec 2001            | 372         | ≤ 18 years             | 54                         | 186   | ≤ 18 years             | 30                         | 186   |
| Minna Risku <sup>a</sup>            | 2012 | Finland        | Aug 2006- Aug<br>2008   | 990         | ≤ 15 years             | 85                         | 878   | ≤ 15 years             | 6                          | 112   |
| Sameena Nawaz <sup>a</sup>          | 2012 | United Kingdom | 1993-1996               | 1772        | ≤ 19 years             | 106                        | 851   | ≤ 19 years             | 163                        | 921   |
| Thaweesak Chieochansin <sup>a</sup> | 2008 | Thailand       | Nov 2005- Sep 2007      | 427         | 4 months-4<br>years    | 2                          | 225   | 2 months-5<br>years    | 0                          | 202   |
| Wei-xia Cheng <sup>a</sup>          | 2008 | China          | July 2006-Sep 2007      | 512         | ≤ 5 years              | 14                         | 397   | ≤ 5 years              | 4                          | 115   |
| Yu Jin <sup>a</sup>                 | 2011 | China          | July 2006- June<br>2008 | 794         | ≤ 5 years              | 162                        | 632   | ≤ 5 years              | 24                         | 162   |
| Zeng Mei <sup>a</sup>               | 2010 | China          | Oct-Dec 2008            | 420         | ≤ 5 years              | 6                          | 220   | ≤ 5 years              | 4                          | 200   |

205 <sup>a</sup>Studies originally from Ri De and colleagues.

## 206 **HBoV prevalence in children with gastroenteritis**

207 The overall pooled prevalence of HBoV infection among 23,664 pediatric cases of  
208 gastroenteritis was estimated at 9.1% (95% CI: 6.7-11.8%;  $I^2 = 97.7%$ ,  $P < 0.001$  for  
209 heterogeneity test) (Fig 2). Subgroup analysis demonstrated the prevalence of HBoV  
210 exposure significantly differed across age category, country, and genotype (Table 3).  
211 By age, HBoV prevalence was significantly higher in cases of gastroenteritis younger  
212 than 5 years (12.1%, 95% CI: 6.8-18.7%), and the lowest prevalence was found in  
213 children between 5 and 10 years (3.4%, 95% CI: 0.2-8.6) ( $P < 0.001$ ). By country, the  
214 highest prevalence of HBoV infection occurred in Egypt at 57.8% (95% CI: 47.7-  
215 67.6%), followed by Australia (29.0%, 95% CI: 22.6-36.1%) and Latvia (25.3%, 95%  
216 CI: 16.4-36.0%), and the lowest one was observed in Korea (0.7%, 95% CI: 0.2-1.4%)  
217 ( $P < 0.001$ ). HBoV prevalence was slightly greater in male patients (9.4%, 95% CI:  
218 5.8-13.8%) compared with female patients (8.7%, 95% CI: 5.7-12.2%) ( $P = 0.785$ ). The  
219 estimated pooled HBoV prevalence did not markedly change when meta-analysis was  
220 limited to the studies that lasted at least 1 year (8.1%, 95% CI: 5.7-10.8,  $P = 0.221$ ,  $I^2$   
221  $= 97.7%$ ,  $P < 0.001$  for heterogeneity test,  $n=27$ ) (S1 Fig).

222 Whether the distribution of HBoV infection differed across pediatric cases of  
223 gastroenteritis and healthy children was further explored. In the 13 studies that included  
224 3121 children without gastroenteritis, the pooled HBoV prevalence was detected in 4.0%  
225 (95% CI: 1.1-8.5%) (S2 Fig), which was significantly lower than that in cases of  
226 gastroenteritis ( $P < 0.001$ ).



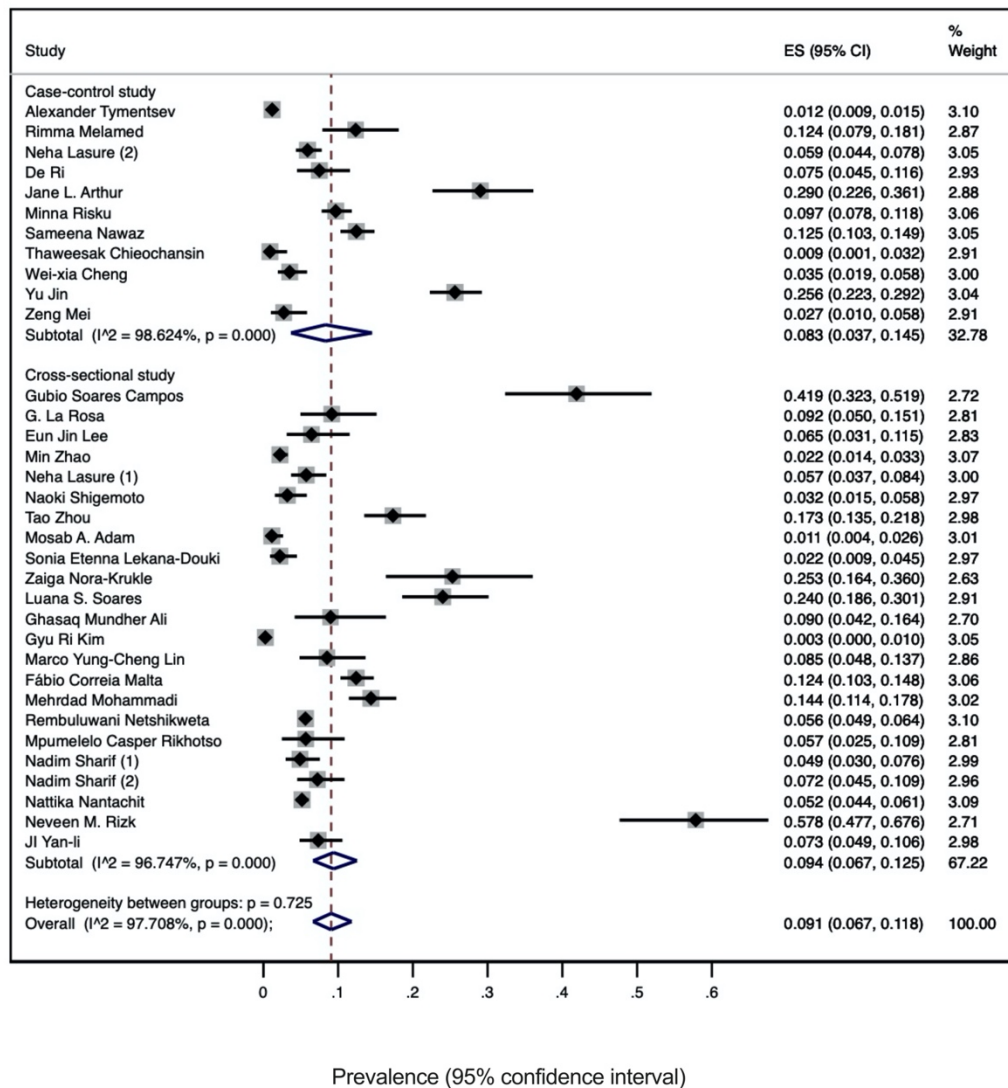

227

228 **Fig 2. Overall pooled prevalence of HBoV infection in children with gastroenteritis**

229 **based on case-control and cross-sectional studies. HBoV, human bocavirus**

231 **Table 3** Estimated HBoV prevalence in children with gastroenteritis by age, gender,  
232 country, and genotype.

| Category        | Subgroup       | Number of studies | Pooled prevalence (% , 95% CI) | Heterogeneity test (I <sup>2</sup> %, <i>P</i> value) | Chi-square test ( <i>P</i> value) |
|-----------------|----------------|-------------------|--------------------------------|-------------------------------------------------------|-----------------------------------|
| <b>Age</b>      | ≤ 1 year       | 8                 | 7.3 (3.6-12.2)                 | 97.142%, < 0.001                                      | <i>P</i> < 0.001                  |
|                 | > 1-5 years    | 10                | 5.2 (1.8-9.9)                  | 96.373%, < 0.001                                      |                                   |
|                 | ≤ 5 years      | 13                | 12.1 (6.8-18.7)                | 97.921%, < 0.001                                      |                                   |
|                 | > 5-10 years   | 2                 | 3.4 (0.2-8.6)                  | < 0.001, < 0.001                                      |                                   |
|                 | Mixed          | 12                | 8.3 (6.2-10.7)                 | 96.949%, < 0.001                                      |                                   |
| <b>Genger</b>   | Male           | 14                | 9.4 (5.8-13.8)                 | 95.789%, < 0.001                                      | <i>P</i> = 0.785                  |
|                 | Female         | 14                | 8.7 (5.7-12.2)                 | 92.220%, < 0.001                                      |                                   |
| <b>Country</b>  | Russia         | 1                 | 1.2 (0.9-1.5)                  | NA                                                    | <i>P</i> < 0.001                  |
|                 | Unite States   | 1                 | 12.4 (7.9-18.1)                | NA                                                    |                                   |
|                 | India          | 2                 | 5.8 (4.6-7.3)                  | < 0.001, <0.001                                       |                                   |
|                 | China          | 8                 | 8.2 (3.1-15.2)                 | 97.572%, <0.001                                       |                                   |
|                 | Brazil         | 3                 | 24.7 (10.8-42.0)               | < 0.001, <0.001                                       |                                   |
|                 | Albania        | 1                 | 9.2 (5.0-15.1)                 | NA                                                    |                                   |
|                 | Korea          | 2                 | 0.7 (0.2-1.4)                  | < 0.001, <0.001                                       |                                   |
|                 | Japan          | 1                 | 3.2 (1.5-5.8)                  | NA                                                    |                                   |
|                 | Sudan          | 1                 | 1.1 (0.4-2.6)                  | NA                                                    |                                   |
|                 | Gabon          | 1                 | 2.2 (0.9-4.5)                  | NA                                                    |                                   |
|                 | Latvia         | 1                 | 25.3 (16.4-36.0)               | NA                                                    |                                   |
|                 | Iraq           | 1                 | 9.0 (4.2-16.4)                 | NA                                                    |                                   |
|                 | Iran           | 1                 | 14.4 (11.4-17.8)               | NA                                                    |                                   |
|                 | South Africa   | 2                 | 5.5 (4.8-6.2)                  | < 0.001, <0.001                                       |                                   |
|                 | Bangladesh     | 2                 | 5.9 (4.2-7.8)                  | < 0.001, <0.001                                       |                                   |
|                 | Australia      | 1                 | 29.0 (22.6-36.1)               | NA                                                    |                                   |
|                 | Finland        | 1                 | 9.7 (7.8-11.8)                 | NA                                                    |                                   |
|                 | United Kingdom | 1                 | 12.5 (10.3-14.9)               | NA                                                    |                                   |
|                 | Tailand        | 2                 | 4.7 (3.9-5.5)                  | < 0.001, <0.001                                       |                                   |
|                 | Egypt          | 1                 | 57.8 (47.7-67.6)               | NA                                                    |                                   |
| <b>Genotype</b> | HBoV1          | 28                | 3.8 (2.7-5.2)                  | 94.878%, < 0.001                                      | <i>P</i> < 0.001                  |
|                 | HBoV2          | 24                | 2.4 (1.3-3.7)                  | 96.249%, < 0.001                                      |                                   |
|                 | HBoV3          | 21                | 0.9 (0.4-1.6)                  | 93.467%, < 0.001                                      |                                   |
|                 | HBoV4          | 16                | 0                              | 14.799, 0.284                                         |                                   |

## 234 **Prevalence and distribution of HBoV genotypes**

235 All four genotypes of HBoV were identified among pediatric cases of gastroenteritis  
236 (Table 3). The predominant genotype of HBoV circulating in children with  
237 gastroenteritis belonged to genotype 1 (HBoV1, 3.8%, 95% CI: 2.7-5.2%) and genotype  
238 2 (HBoV2, 2.4%, 95% CI: 1.3-3.7%). Sixteen countries had reported the genotype  
239 distribution of HBoV. At the global level, HBoV1 dominated (50.5%), followed by  
240 HBoV2 (36.6%) and HBoV3 (12.0%). The estimated genotype distribution by country  
241 is depicted in Fig 3.

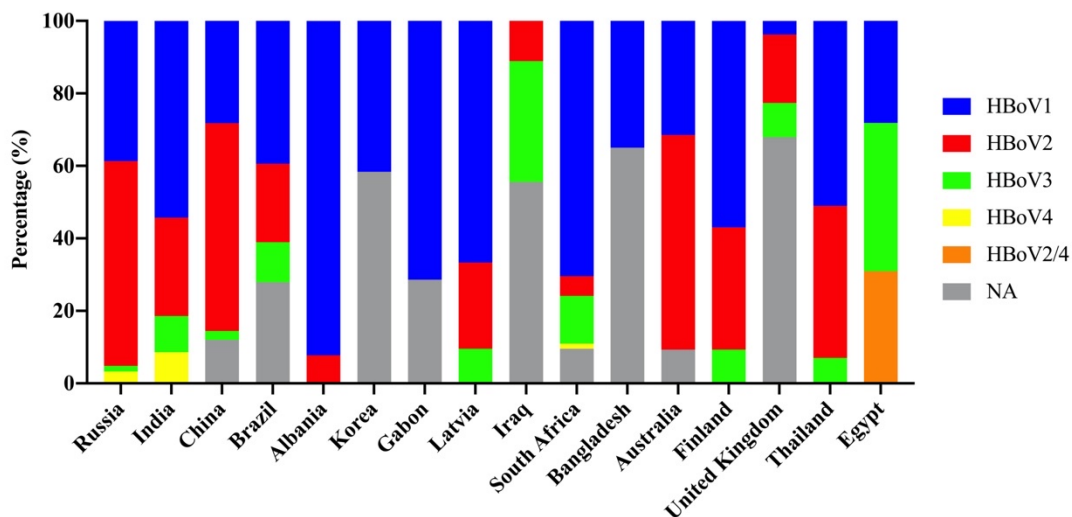

242  
243 **Fig 3. Genotype distribution by country**

244

## 245 **Association between HBoV infection and the risk of** 246 **gastroenteritis in children**

247 A quality assessment was performed for each study with a case-control design utilizing  
248 the NOS recommended by the Cochrane Collaboration (62). All eleven included case-  
249 control studies met the criteria for NOS and none of the poor quality (S2 Table). We

250 conducted the second analysis based on case-control studies to investigate the  
 251 relationship between HBoV infection and the risk of gastroenteritis in children, with  
 252 the pooled OR value of 1.620 (95% CI: 1.023-2.566;  $I^2 = 73.6\%$ ,  $P < 0.001$  for  
 253 heterogeneity test) being reported (Fig 4). In regard to HBoV genotypes, only HBoV2  
 254 showed a statistically significant correlation with gastroenteritis in children (OR 1.75,  
 255 95% CI: 1.30-2.35). Among different countries, the significant association of HBoV  
 256 infection with gastroenteritis was observed in India, China, and Australia. Detailed  
 257 associations between HBoV infection and gastroenteritis for subgroups were displayed  
 258 in Fig 5. Using a visual inspection of the funnel plot and statistical tests, no evidence  
 259 of publication bias was recognized ( $P = 0.876$  for Begg's test and  $P = 0.145$  for Egger's  
 260 test) (Fig 6).

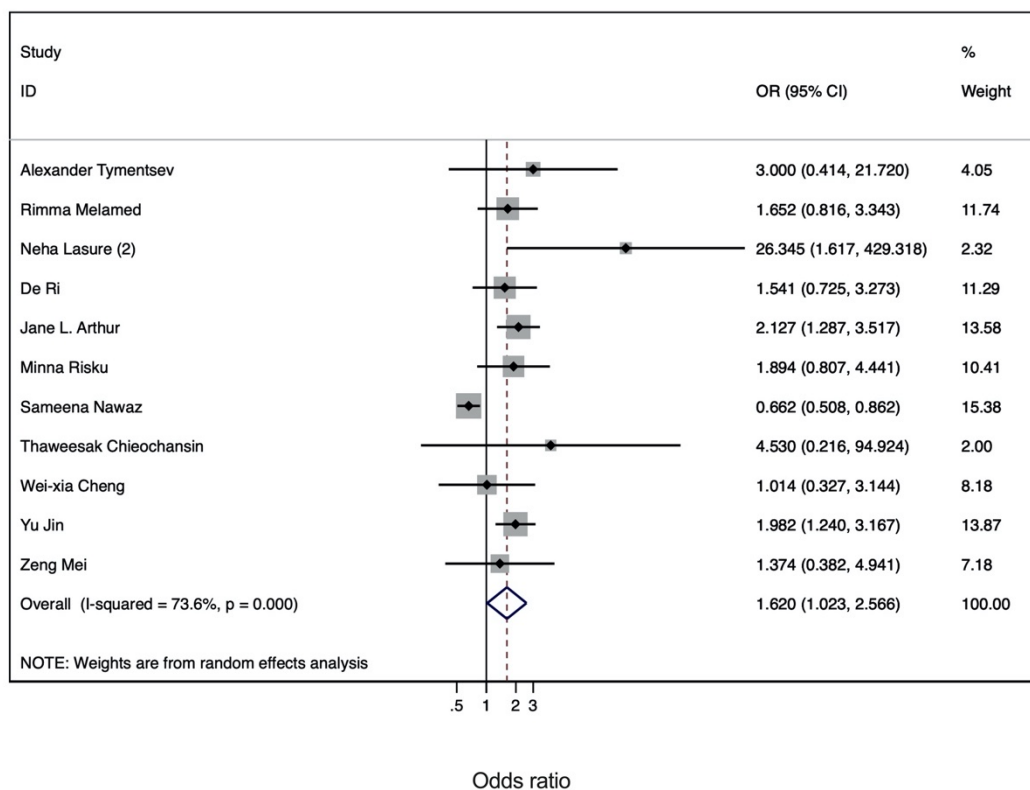

261

262 **Fig 4. Forest plot of the association between HBoV infection and the risk of**

263 **gastroenteritis in children.** HBoV, human bocavirus; OR, odds ratio; CI, confidence

264 interval

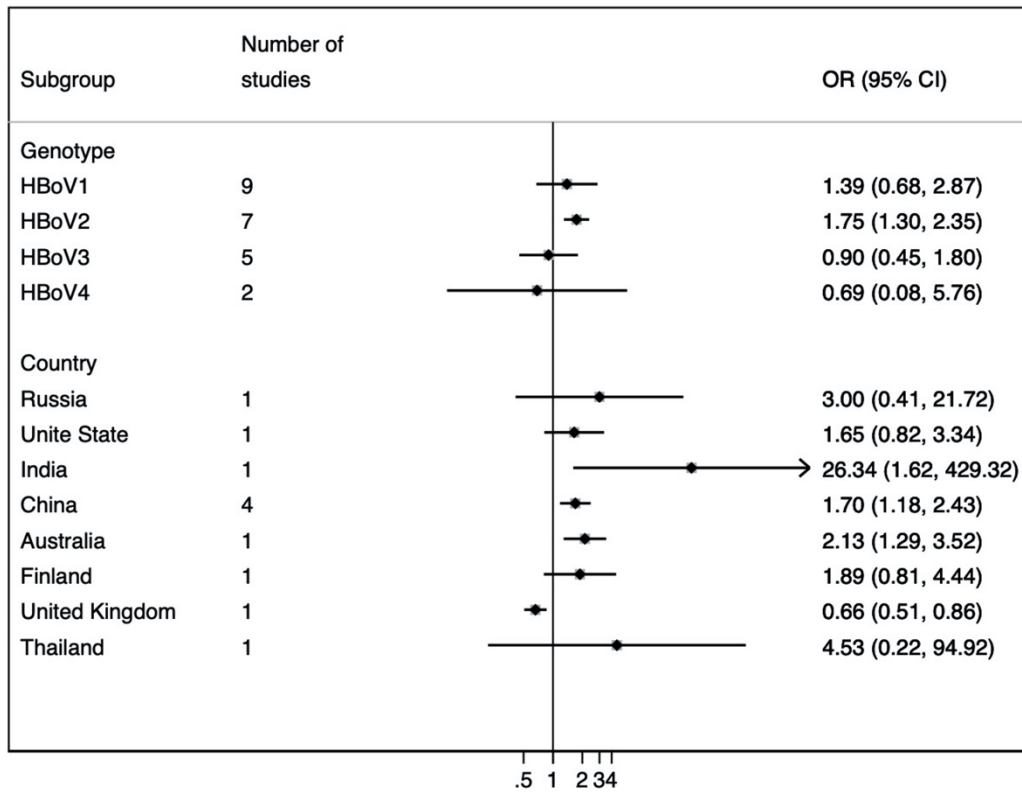

265

Odds ratio

266 **Fig 5. Forest plot of the association between HBoV infection and the risk of**

267 **gastroenteritis in children by genotype and country.** HBoV, human bocavirus; OR,

268 odds ratio; CI, confidence interval

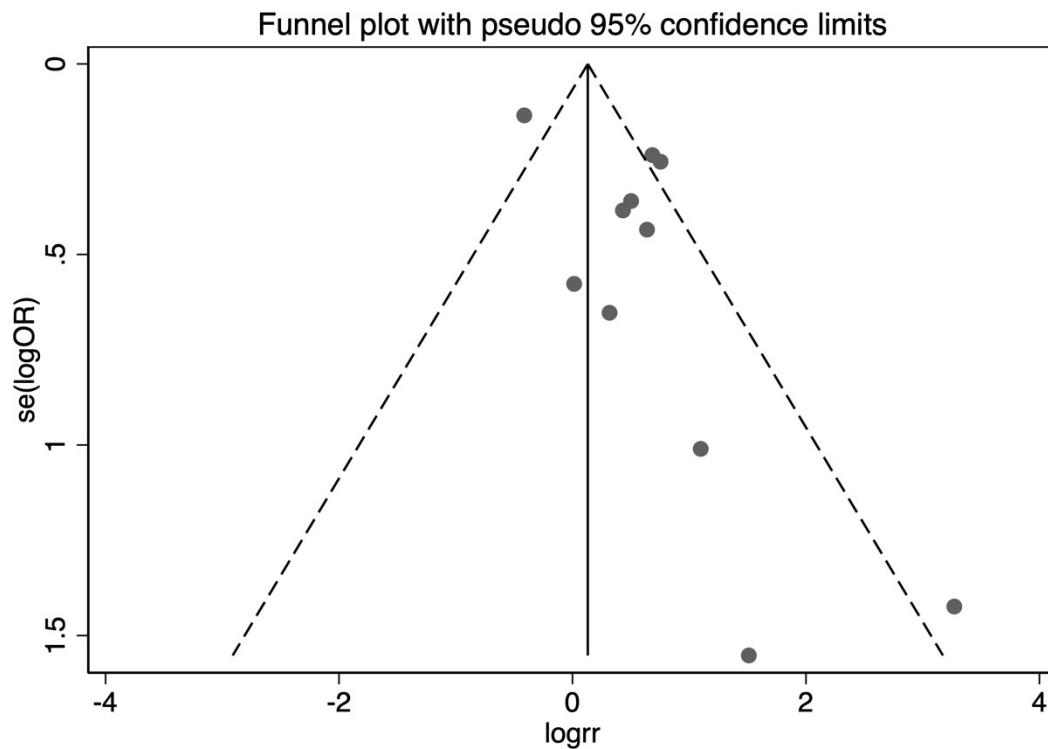

269

270

**Fig 6. Funnel plot for assessment of publication bias**

## 271 Discussion

272 HBoV has been considered a major pathogen that contributed to respiratory and  
273 gastrointestinal infections in particular younger children (63, 64). Following its first  
274 identification in Sweden, HBoV has been frequently detected in patients with various  
275 diseases throughout the Europe (65-67), North (68, 69) and South America (70, 71),  
276 Australia (72, 73), Asia (74, 75), and Africa (76, 77). In addition to respiratory and  
277 feces specimens, HBoV has also been identified in blood (78), urine (79), saliva (80),  
278 cerebrospinal fluid (81), and even environmental samples (82, 83). The current  
279 evidence clearly illustrates the potential risk of HBoV exposure for human health. In  
280 this review and meta-analysis, we summarized the results of 36 studies, including a  
281 total of 23,664 pediatric cases of gastroenteritis. The updated overall estimate suggested

282 that HBoV infection is associated with 9.1% of all gastroenteritis cases in children,  
283 which confirms and extends the earlier results of a systematic review and meta-analysis  
284 of HBoV conducted by Ri De (22). This growing estimate emphasized that HBoV  
285 infection contributes to the increased global burden of gastroenteritis in children.

286 In comparison to the previous meta-analysis (22) that only involved children aged  
287 under five years, the age distribution of HBoV-associated gastroenteritis in children  
288 younger than 18 years was available in the present work. These data revealed that  
289 children under five years of age were the most susceptible to develop gastroenteritis  
290 when infected with HBoV, with the highest prevalence of HBoV-associated  
291 gastroenteritis cases (12.1%). From the results of more specific age groups, the  
292 relatively high frequencies of HBoV were also found in the age groups less than one  
293 year old (7.3%) and between 1 and 5 years old (5.2%). These findings tie well with  
294 previous reports wherein younger children might undergo a higher occurrence of  
295 HBoV-associated gastroenteritis. For example, a recent large-scale survey conducted  
296 in South Africa with 3765 fecal samples collected from hospitalized children for  
297 gastroenteritis illustrated that more than 90% of HBoV-associated cases were children  
298 younger than two years (84). A case-control study in the UK concluded that although  
299 HBoV is relatively common across all age groups, the risk of HBoV-associated  
300 gastroenteritis derived from preschool-age children was expected to be higher  
301 compared with adults (37). Furthermore, Mehrdad et al. reported that the significant  
302 age category in HBoV-positive samples was between 1 and 2 years old and have  
303 concluded that the prevalence of gastrointestinal tract infection with HBoV occurs

304 precisely in the age range of digestive illnesses resulted from rotavirus (85). Our  
305 findings also matched several reviews focused on global norovirus (NoV) prevalence,  
306 demonstrating that most pediatric NoV-associated gastroenteritis occurred in children  
307 under two years of age (86, 87). Taken together, childhood gastroenteritis caused by  
308 HBoV and other known gastroenteritis-related viruses occurs precisely within the same  
309 age range. Thus, HBoV is much likely to figure as a potential etiological agent of  
310 gastroenteritis.

311 Comparisons across different countries showed that the highest HBoV prevalence in  
312 children with gastroenteritis was observed in Egypt (57.8%), followed by Australia  
313 (29.0%), Latvia (25.3%), and Brazil (24.7%). The lowest HBoV prevalence occurred  
314 in pediatric patients from Korea (0.7%). In line with the previous demonstration, these  
315 results confirmed that HBoV had been identified worldwide without any regional or  
316 geographic restrictions (63). However, these findings go beyond previous reports,  
317 which indicated a trend of decreasing prevalence from the developing countries to the  
318 developed countries (88, 89). For illustration, a case-control assessment conducted in  
319 the United States revealed that HBoV infection was related to 12.4% of all cases of  
320 acute childhood diarrhea (29). Nonetheless, the pooled HBoV prevalence was estimated  
321 at 5.8% among 1196 pediatric cases in India. It remains unclear to what complicated  
322 reasons attributed to the wide variation of HBoV prevalence across the world in  
323 addition to ethnicity, nutritional status, hygiene conditions, healthcare settings, and the  
324 various sample size of the study. More comprehensive studies should take into account  
325 the concrete reasons for HBoV prevalence in multiple geographies.



326 Consistent with previous evidence indicating less susceptibility to viral infections in  
327 females (90), our data supported that males are more susceptible than females to  
328 develop HBoV-associated gastroenteritis, with 9.4% and 8.7% of HBoV prevalence in  
329 male patients and female patients, respectively. However, no significant differences  
330 were observed in HBoV prevalence based on gender. Further research is needed to  
331 address this information lacuna.

332 Four HBoV genotypes have been described based on the genomic analyses of VP1  
333 and VP2 sequences. Globally, HBoV1 accounted for more than half of all infections in  
334 children with gastroenteritis, which also dominated in most countries. It was also found  
335 that only one genotype was presented in Korea (HBoV1), Gabon (HBoV1), and  
336 Bangladesh (HBoV2). The estimated genotype distribution by country displayed  
337 considerable regional variations. As already mentioned, HBoV1 is commonly prevalent  
338 in clinical specimens of the respiratory tract, whereas HBoV2-4 are more frequently  
339 detected in patients with gastrointestinal infections and symptoms (64). Additionally, a  
340 recent relevant study in Taiwan demonstrated that HBoV1 and HBoV2 are generally  
341 the primary species in childhood gastrointestinal infections worldwide (43). The  
342 prevalence of HBoV genotypes has been investigated in children with gastroenteritis in  
343 the previous meta-analysis (22). The researchers showed that HBoV1 and HBoV2 were  
344 detected in 3.49% and 8.59% of pediatric cases with gastroenteritis. These previous  
345 results from Ri De et al. seem to be inappropriate for comparison because of which  
346 estimated data based on only ten case-control studies. In our updated review, HBoV1  
347 (3.8%) figured as the predominant genotype circulating in children with gastroenteritis,

348 and HBoV2, with a prevalence of 2.4% in the next rank. Even though HBoV1 can also  
349 be found in fecal samples from pediatric patients suffering from gastroenteritis, this  
350 novel finding suggested the prevalent HBoV variant changed related to childhood  
351 gastroenteritis during the past years. Likewise, during a 3-year observation in Russia,  
352 all four HBoV genotypes with differing detection rates have been identified in children  
353 hospitalized with diarrhea (91). Hence, we believe that continuous surveillance of this  
354 virus would be vital in pointing out how the prevalent HBoV genetic variants change  
355 with time. With regard to other genotypes, we identified the relatively low prevalence  
356 of HBoV3 in children with gastroenteritis (0.9%), while HBoV4 was only determined  
357 in four included studies. Since the lower prevalence and frequency of the other  
358 genotypes, it remains to be resolved whether other genotypes display a pathogenic role  
359 in childhood gastroenteritis.

360 Using data from 11 case-control studies, a meta-analysis provided new evidence to  
361 construct pooled risk effects of HBoV-associated gastroenteritis. It was found that  
362 children infected with HBoV have approximately 1.6 times increased chance of  
363 developing gastrointestinal symptoms compared with uninfected controls, indicating  
364 that HBoV exposure is significantly associated with a higher risk of gastroenteritis in  
365 children (OR 1.620, 95% CI: 1.023-2.566). Additionally, the presence specifically of  
366 all four HBoV genotypes was examined for the purpose of determining any possible  
367 associations between specific HBoV genotypes and gastroenteritis in children. The  
368 analytical results indicated that HBoV2 was significantly correlated with gastroenteritis  
369 in children (OR 1.746, 95% CI: 1.296-2.351), whereas other genotypes have not yet

370 disease association. This supports Arthur and coworkers who have proven the  
371 association between HBoV2 infection and gastroenteritis using multivariate conditional  
372 logistic regression analysis (11). However, the pathogenic role of HBoV2 has been  
373 challenged by Ong et al. (92), demonstrating that HBoV in stool is probably an innocent  
374 bystander rather than a true pathogen due to high coinfection with other pathogens. It  
375 has also been questioned owing to the fact that HBoV was frequently detected in  
376 healthy or diarrhea-free individuals (17). In this updated review, the pooled prevalence  
377 of HBoV infection was estimated at 4.0% in children without gastroenteritis, which  
378 significantly lower than that in pediatric patients ( $P < 0.001$ ). The most likely  
379 explanation for the presence of HBoV in feces from asymptomatic individuals can be  
380 linked to the long-term viral shedding following symptomatic infection (93, 94). This  
381 regard does not repudiate the role of HBoV as the etiological agent of gastrointestinal  
382 symptoms in children. Furthermore, the significantly positive association of HBoV  
383 infection with childhood gastroenteritis were observed in India (OR 26.34, 95% CI:  
384 1.62-429.32), China (OR 1.70, 95% CI: 1.18-2.43), and Australia (OR 2.13, 95% CI:  
385 1.29-3.52), while it was shown inverse association in the UK (OR 0.66, 95% CI: 0.51-  
386 0.86). The findings varied across countries might be due to the regional differences in  
387 viral epidemiology, geographic location, and seasonality (18, 95, 96).

388 Several limitations of the previous study (22) were addressed in the present work.  
389 However, it remains some limitations such as the lack of a large number of eligible  
390 research data and not considering other factors that might affect the results. Furthermore,  
391 the present work only included children diagnosed with gastroenteritis or diarrhea as

392 cases, making it probably underestimate the burden of HBoV infection on the  
393 development of childhood gastroenteritis.

## 394 **Conclusion**

395 In summary, the pooled prevalence of HBoV infection in children suffering from  
396 gastroenteritis was estimated at 9.1% between 2016 and 2021, showing a higher global  
397 burden of gastroenteritis in children caused by HBoV than in the last decade. The  
398 considerably higher HBoV prevalence was found in pediatric patients less than five  
399 years of age and in Egypt. Notably, the correlation of HBoV infection with  
400 gastroenteritis in children was established in this updated review. Our findings also add  
401 to the growing evidence that HBoV2 would be a causative agent of gastrointestinal  
402 symptoms. However, this conclusion should be treated with caution as the known  
403 gastroenteritis-associated viruses are not excluded. The actual pathogenic role of HBoV  
404 in leading to childhood gastroenteritis were needed to be determined by large-scale  
405 continuous surveillance, serological investigation, and appropriate animal models.

## 407 **References**

- 408 1. World Health Organization. Diarrhoeal Disease. 2020 [Available from:  
409 <https://www.who.int/news-room/fact-sheets/detail/diarrhoeal-disease>.
- 410 2. Harb A, Abraham S, Rusdi B, Laird T, O'Dea M, Habib I. Molecular Detection and  
411 Epidemiological Features of Selected Bacterial, Viral, and Parasitic Enteropathogens  
412 in Stool Specimens from Children with Acute Diarrhea in Thi-Qar Governorate, Iraq.  
413 *Int J Environ Res Public Health*. 2019;16(9).
- 414 3. Reymão TK, Hernandez JD, Costa ST, Sousa MS, Oliveira DS, Silva LD, et al.  
415 Sapoviruses in children with acute gastroenteritis from Manaus, Amazon region, Brazil,  
416 2010-2011. *Rev Inst Med Trop Sao Paulo*. 2016;58:81.
- 417 4. Chow CM, Leung AK, Hon KL. Acute gastroenteritis: from guidelines to real life.  
418 *Clin Exp Gastroenterol*. 2010;3:97-112.
- 419 5. Allander T, Tammi MT, Eriksson M, Bjerkner A, Tiveljung-Lindell A, Andersson  
420 B. Cloning of a human parvovirus by molecular screening of respiratory tract samples.  
421 *Proceedings of the National Academy of Sciences*. 2005;102(36):12891-6.
- 422 6. Riera-Montes M, O'Ryan M, Verstraeten T. Norovirus and Rotavirus Disease  
423 Severity in Children: Systematic Review and Meta-analysis. *Pediatr Infect Dis J*.  
424 2018;37(6):501-5.
- 425 7. Aliabadi N, Antoni S, Mwenda JM, Weldegebriel G, Biey JNM, Cheikh D, et al.  
426 Global impact of rotavirus vaccine introduction on rotavirus hospitalisations among  
427 children under 5 years of age, 2008-16: findings from the Global Rotavirus Surveillance  
428 Network. *Lancet Glob Health*. 2019;7(7):e893-e903.
- 429 8. Schildgen O, Qiu J, Söderlund-Venermo M. Genomic features of the human  
430 bocaviruses. *Future Virol*. 2012;7(1):31-9.
- 431 9. Brieu N, Gay B, Segondy M, Foulongne V. Electron microscopy observation of  
432 human bocavirus (HBoV) in nasopharyngeal samples from HBoV-infected children. *J*  
433 *Clin Microbiol*. 2007;45(10):3419-20.
- 434 10. Gurda BL, Parent KN, Bladek H, Sinkovits RS, DiMattia MA, Rence C, et al.  
435 Human bocavirus capsid structure: insights into the structural repertoire of the

- 436 parvoviridae. *J Virol.* 2010;84(12):5880-9.
- 437 11. Arthur JL, Higgins GD, Davidson GP, Givney RC, Ratcliff RM. A novel bocavirus  
438 associated with acute gastroenteritis in Australian children. *PLoS Pathog.*  
439 2009;5(4):e1000391.
- 440 12. Kapoor A, Simmonds P, Slikas E, Li L, Bodhidatta L, Sethabutr O, et al. Human  
441 bocaviruses are highly diverse, dispersed, recombination prone, and prevalent in enteric  
442 infections. *J Infect Dis.* 2010;201(11):1633-43.
- 443 13. Allander T, Jartti T, Gupta S, Niesters HG, Lehtinen P, Osterback R, et al. Human  
444 bocavirus and acute wheezing in children. *Clin Infect Dis.* 2007;44(7):904-10.
- 445 14. Fry AM, Lu X, Chittaganpitch M, Peret T, Fischer J, Dowell SF, et al. Human  
446 bocavirus: a novel parvovirus epidemiologically associated with pneumonia requiring  
447 hospitalization in Thailand. *J Infect Dis.* 2007;195(7):1038-45.
- 448 15. Moriyama Y, Hamada H, Okada M, Tsuchiya N, Maru H, Shirato Y, et al.  
449 Distinctive clinical features of human bocavirus in children younger than 2 years. *Eur*  
450 *J Pediatr.* 2010;169(9):1087-92.
- 451 16. Falahi S, Sayyadi H, Abdoli A, Kenarkoobi A, Mohammadi S. The prevalence of  
452 human bocavirus in <2-year-old children with acute bronchiolitis. *New Microbes New*  
453 *Infect.* 2020;37:100736.
- 454 17. Jartti T, Hedman K, Jartti L, Ruuskanen O, Allander T, Söderlund-Venermo M.  
455 Human bocavirus-the first 5 years. *Rev Med Virol.* 2012;22(1):46-64.
- 456 18. Jin Y, Cheng WX, Xu ZQ, Liu N, Yu JM, Li HY, et al. High prevalence of human  
457 bocavirus 2 and its role in childhood acute gastroenteritis in China. *J Clin Virol.*  
458 2011;52(3):251-3.
- 459 19. Rizk NM, Abd-Elmaksoud S, Farid TM, Abohashish MMA, Al-Herrawy AZ,  
460 Hamza IA. Etiology of diarrheal disease among children under 5 years in Egypt: a high  
461 incidence of human bocavirus. *J Egypt Public Health Assoc.* 2021;96(1):24.
- 462 20. Sousa TT, Almeida TNV, Fiaccadori FS, Souza M, Badr KR, Cardoso D.  
463 Identification of Human Bocavirus type 4 in a child asymptomatic for respiratory tract  
464 infection and acute gastroenteritis - Goiânia, Goiás, Brazil. *Braz J Infect Dis.*  
465 2017;21(4):472-6.

- 466 21. Okitsu S, Khamrin P, Takanashi S, Thongprachum A, Hoque SA, Takeuchi H, et  
467 al. Molecular detection of enteric viruses in the stool samples of children without  
468 diarrhea in Bangladesh. *Infect Genet Evol.* 2020;77:104055.
- 469 22. De R, Liu L, Qian Y, Zhu R, Deng J, Wang F, et al. Risk of acute gastroenteritis  
470 associated with human bocavirus infection in children: A systematic review and meta-  
471 analysis. *PLoS One.* 2017;12(9):e0184833.
- 472 23. Knobloch K, Yoon U, Vogt PM. Preferred reporting items for systematic reviews  
473 and meta-analyses (PRISMA) statement and publication bias. *J Craniomaxillofac Surg.*  
474 2011;39(2):91-2.
- 475 24. Peterson J, Welch V, Losos M, Tugwell P. The Newcastle-Ottawa scale (NOS) for  
476 assessing the quality of nonrandomised studies in meta-analyses. Ottawa: Ottawa  
477 Hospital Research Institute. 2011:1-12.
- 478 25. DerSimonian R, Laird N. Meta-analysis in clinical trials. *Controlled clinical trials.*  
479 1986;7(3):177-88.
- 480 26. Higgins JP, Thompson SG, Deeks JJ, Altman DG. Measuring inconsistency in  
481 meta-analyses. *Bmj.* 2003;327(7414):557-60.
- 482 27. Begg CB, Mazumdar M. Operating characteristics of a rank correlation test for  
483 publication bias. *Biometrics.* 1994;50(4):1088-101.
- 484 28. Egger M, Davey Smith G, Schneider M, Minder C. Bias in meta-analysis detected  
485 by a simple, graphical test. *Bmj.* 1997;315(7109):629-34.
- 486 29. Melamed R, Storch GA, Holtz LR, Klein EJ, Herrin B, Tarr PI, et al. Case-control  
487 assessment of the roles of noroviruses, human bocaviruses 2, 3, and 4, and novel  
488 polyomaviruses and astroviruses in acute childhood diarrhea. *Journal of the Pediatric*  
489 *Infectious Diseases Society.* 2017;6(3):e49-e54.
- 490 30. Lasure N, Gopalkrishna V. Changing pattern of genotypic circulation of human  
491 bocavirus variants associated with acute gastroenteritis in Pune, Western India: A 5-  
492 year retrospective study. *J Med Virol.* 2019;91(10):1887-90.
- 493 31. De R, Liu LY, Qian Y, Jia LP, Dong HJ, Zhu RN, et al. [Correlation between  
494 human bocavirus 2 infection in children and acute diarrhea in Beijing]. *Zhonghua Er*  
495 *Ke Za Zhi.* 2018;56(12):945-9.

- 496 32. Tymentsev A, Tikunov A, Zhirakovskaia E, Kurilshchikov A, Babkin I, Klemesheva  
497 V, et al. Human bocavirus in hospitalized children with acute gastroenteritis in Russia  
498 from 2010 to 2012. *Infection, Genetics and Evolution*. 2016;37:143-9.
- 499 33. Zeng M, Wang XH, Yu H, Zhu QR. [Clinical relevance of human bocavirus with  
500 acute respiratory tract infection and diarrhea in children: a prospective case-control  
501 study]. *Zhonghua Er Ke Za Zhi*. 2010;48(8):580-4.
- 502 34. Cheng WX, Jin Y, Duan ZJ, Xu ZQ, Qi HM, Zhang Q, et al. Human bocavirus in  
503 children hospitalized for acute gastroenteritis: a case-control study. *Clin Infect Dis*.  
504 2008;47(2):161-7.
- 505 35. Chieochansin T, Thongmee C, Vimolket L, Theamboonlers A, Poovorawan Y.  
506 Human bocavirus infection in children with acute gastroenteritis and healthy controls.  
507 *Jpn J Infect Dis*. 2008;61(6):479-81.
- 508 36. Risku M, Kätkä M, Lappalainen S, Räsänen S, Vesikari T. Human bocavirus types  
509 1, 2 and 3 in acute gastroenteritis of childhood. *Acta Paediatr*. 2012;101(9):e405-10.
- 510 37. Nawaz S, Allen DJ, Aladin F, Gallimore C, Iturriza-Gómara M. Human  
511 bocaviruses are not significantly associated with gastroenteritis: results of retesting  
512 archive DNA from a case control study in the UK. *PLoS One*. 2012;7(7):e41346.
- 513 38. Ji Y, Wang Y, Yang Q, Cui H, Jin B. Epidemiological and phylogenetic analysis  
514 of human bocavirus from children with acute gastroenteritis in Beijing in 2016. *Journal*  
515 *of Pathogen Biology*. 2017;12(9).
- 516 39. Ali GM, Hussein AA, Kadim JI, Aufi IM. Detecting and Genotyping of Human  
517 Bocavirus among Children with Gastroenteritis in Diyala Governorate. *Annals of*  
518 *Tropical Medicine and Public Health*. 2020;23(14).
- 519 40. Shigemoto N, Hisatsune Y, Toukubo Y, Tanizawa Y, Shimazu Y, Takao S, et al.  
520 Detection of Gastroenteritis Viruses Among Pediatric Patients in Hiroshima Prefecture,  
521 Japan, Between 2006 and 2013 Using Multiplex Reverse Transcription PCR-Based  
522 Assays Involving Fluorescent Dye-Labeled Primers. *Journal of Medical Virology*.  
523 2017;89(5):791-800.
- 524 41. Lekana-Douki SE, Behillil S, Enouf V, Leroy EM, Berthet N. Detection of human  
525 bocavirus-1 in both nasal and stool specimens from children under 5 years old with



- 526 influenza-like illnesses or diarrhea in Gabon. *BMC Research Notes*. 2018;11(1).
- 527 42. Rizk NM, Abd-Elmaksoud S, Farid TM, Abohashish MMA, Al-Herrawy AZ,  
528 Hamza IA. Etiology of diarrheal disease among children under 5 years in Egypt: a high  
529 incidence of human bocavirus. *Journal of the Egyptian Public Health Association*.  
530 2021;96(1).
- 531 43. Lin MY, Chan HC, Chi H, Chiu SC, Nora-Krukke Z, Rasa-Dzelzkaleja S, et al.  
532 Genetic Diversity and Phylogenetic Analysis of Human Bocavirus 2 in Pediatric  
533 Patients with Acute Gastroenteritis in Taiwan. *Int J Environ Res Public Health*.  
534 2020;17(3).
- 535 44. Nantachit N, Kochjan P, Khamrin P, Kumthip K, Maneekarn N. Human bocavirus  
536 genotypes 1, 2, and 3 circulating in pediatric patients with acute gastroenteritis in  
537 Chiang Mai, Thailand, 2012-2018. *J Infect Public Health*. 2021;14(2):179-86.
- 538 45. Campos GS, Silva Sampaio ML, Menezes AD, Tigre DM, Moura Costa LF,  
539 Chinalia FA, et al. Human bocavirus in acute gastroenteritis in children in Brazil. *J Med*  
540 *Virol*. 2016;88(1):166-70.
- 541 46. Malta FC, Varella RB, Guimaraes M, Miagostovich MP, Fumian TM. Human  
542 Bocavirus in Brazil: Molecular Epidemiology, Viral Load and Co-Infections.  
543 *Pathogens*. 2020;9(8).
- 544 47. La Rosa G, Della Libera S, Iaconelli M, Donia D, Cenko F, Xhelilaj G, et al.  
545 Human bocavirus in children with acute gastroenteritis in Albania. *Journal of Medical*  
546 *Virology*. 2016;88(5):906-10.
- 547 48. Lee EJ, Kim HS, Kim HS, Kim JS, Song W, Kim M, et al. Human Bocavirus in  
548 Korean Children with Gastroenteritis and Respiratory Tract Infections. *BioMed*  
549 *Research International*. 2016;2016.
- 550 49. Nora-Krukke Z, Vilmane A, Xu M, Rasa S, Ziemele I, Silina E, et al. Human  
551 Bocavirus Infection Markers in Peripheral Blood and Stool Samples of Children with  
552 Acute Gastroenteritis. *Viruses*. 2018;10(11).
- 553 50. Mohammadi M, Armin S, Yazdanpour Z. Human bocavirus infections and co-  
554 infections with respiratory syncytial virus and Rotavirus in children with acute  
555 respiratory or gastrointestinal disease. *Brazilian Journal of Microbiology*.

- 556 2020;51(1):45-51.
- 557 51. Sharif N, Nobel NU, Sakib N, Liza SM, Khan ST, Billah B, et al. Molecular and  
558 epidemiologic analysis of diarrheal pathogens in children with acute gastroenteritis in  
559 Bangladesh during 2014-2019. *Pediatric Infectious Disease Journal*. 2020:580-5.
- 560 52. Sharif N, Parvez AK, Haque A, Talukder AA, Ushijima H, Dey SK. Molecular and  
561 epidemiological trends of human bocavirus and adenovirus in children with acute  
562 gastroenteritis in Bangladesh during 2015 to 2019. *Journal of Medical Virology*.  
563 2020;92(12):3194-201.
- 564 53. Okitsu S, Khamrin P, Takanashi S, Thongprachum A, Hoque SA, Takeuchi H, et  
565 al. Molecular detection of enteric viruses in the stool samples of children without  
566 diarrhea in Bangladesh. *Infection, Genetics and Evolution*. 2020;77.
- 567 54. Lasure N, Gopalkrishna V. Molecular epidemiology and clinical severity of  
568 Human Bocavirus (HBoV) 1-4 in children with acute gastroenteritis from Pune,  
569 Western India. *J Med Virol*. 2017;89(1):17-23.
- 570 55. Soares LS, Lima ABF, Pantoja KC, Lobo PS, Cruz JF, Guerra SFS, et al. Molecular  
571 epidemiology of human bocavirus in children with acute gastroenteritis from North  
572 Region of Brazil. *J Med Microbiol*. 2019;68(8):1233-9.
- 573 56. Netshikweta R, Chidamba L, Nadan S, Taylor MB, Page NA. Molecular  
574 epidemiology of human bocavirus infection in hospitalized children with acute  
575 gastroenteritis in South Africa, 2009-2015. *Journal of Medical Virology*.  
576 2020;92(8):1124-32.
- 577 57. Adam MA, Wang J, Enan KA, Shen HW, Wang H, El Hussein AR, et al. Molecular  
578 Survey of Viral and Bacterial Causes of Childhood Diarrhea in Khartoum State, Sudan.  
579 *Frontiers in Microbiology*. 2018;9.
- 580 58. Rikhotso MC, Khumela R, Kabue JP, Traore-Hoffman IAN, Potgieter N.  
581 Predominance of Human Bocavirus Genotype 1 and 3 in Outpatient Children with  
582 Diarrhea from Rural Communities in South Africa, 2017-2018. *Pathogens*. 2020;9(4).
- 583 59. Zhou T, Chen YH, Chen JY, Hu PW, Zheng TL, Xu X, et al. Prevalence and  
584 clinical profile of human bocavirus in children with acute gastroenteritis in Chengdu,  
585 West China, 2012-2013. *Journal of Medical Virology*. 2017;89(10):1743-8.

- 586 60. Zhao M, Zhu RA, Qian Y, Deng J, Wang F, Sun Y, et al. Prevalence and  
587 Phylogenetic Analysis of Human Bocaviruses 1-4 in Pediatric Patients with Various  
588 Infectious Diseases. *Plos One*. 2016;11(8).
- 589 61. Kim GR, Kim SH, Jeon GW, Shin JH. Prevalence of eleven infectious viruses  
590 causing diarrhea in korea. *Japanese Journal of Infectious Diseases*. 2020;73(6):427-30.
- 591 62. Stang A. Critical evaluation of the Newcastle-Ottawa scale for the assessment of  
592 the quality of nonrandomized studies in meta-analyses. *Eur J Epidemiol*.  
593 2010;25(9):603-5.
- 594 63. Guido M, Tumolo MR, Verri T, Romano A, Serio F, De Giorgi M, et al. Human  
595 bocavirus: Current knowledge and future challenges. *World J Gastroenterol*.  
596 2016;22(39):8684-97.
- 597 64. Schildgen O. Human bocavirus: lessons learned to date. *Pathogens*. 2013;2(1):1-  
598 12.
- 599 65. Modrow S, Wenzel JJ, Schimanski S, Schwarzbeck J, Rothe U, Oldenburg J, et al.  
600 Prevalence of nucleic acid sequences specific for human parvoviruses, hepatitis A and  
601 hepatitis E viruses in coagulation factor concentrates. *Vox Sang*. 2011;100(4):351-8.
- 602 66. Fabbiani M, Terrosi C, Martorelli B, Valentini M, Bernini L, Cellesi C, et al.  
603 Epidemiological and clinical study of viral respiratory tract infections in children from  
604 Italy. *J Med Virol*. 2009;81(4):750-6.
- 605 67. Söderlund-Venermo M, Lahtinen A, Jartti T, Hedman L, Kempainen K, Lehtinen  
606 P, et al. Clinical assessment and improved diagnosis of bocavirus-induced wheezing in  
607 children, Finland. *Emerg Infect Dis*. 2009;15(9):1423-30.
- 608 68. Longtin J, Bastien M, Gilca R, Leblanc E, de Serres G, Bergeron MG, et al. Human  
609 bocavirus infections in hospitalized children and adults. *Emerg Infect Dis*.  
610 2008;14(2):217-21.
- 611 69. Albuquerque MC, Pena GP, Varella RB, Gallucci G, Erdman D, Santos N. Novel  
612 respiratory virus infections in children, Brazil. *Emerg Infect Dis*. 2009;15(5):806-8.
- 613 70. Ghietto LM, Cámara A, Cámara J, Adamo MP. High frequency of human  
614 bocavirus 1 DNA in infants and adults with lower acute respiratory infection. *J Med*  
615 *Microbiol*. 2012;61(Pt 4):548-51.

- 616 71. Ghietto LM, Cámara A, Zhou Y, Pedranti M, Ferreyra S, Frey T, et al. High  
617 prevalence of human bocavirus 1 in infants with lower acute respiratory tract disease in  
618 Argentina, 2007-2009. *Braz J Infect Dis.* 2012;16(1):38-44.
- 619 72. Arden KE, Chang AB, Lambert SB, Nissen MD, Sloots TP, Mackay IM. Newly  
620 identified respiratory viruses in children with asthma exacerbation not requiring  
621 admission to hospital. *J Med Virol.* 2010;82(8):1458-61.
- 622 73. Arden KE, McErlean P, Nissen MD, Sloots TP, Mackay IM. Frequent detection of  
623 human rhinoviruses, paramyxoviruses, coronaviruses, and bocavirus during acute  
624 respiratory tract infections. *J Med Virol.* 2006;78(9):1232-40.
- 625 74. Khamrin P, Malasao R, Chaimongkol N, Ukarapol N, Kongsricharoern T, Okitsu  
626 S, et al. Circulating of human bocavirus 1, 2, 3, and 4 in pediatric patients with acute  
627 gastroenteritis in Thailand. *Infect Genet Evol.* 2012;12(3):565-9.
- 628 75. Pham NT, Trinh QD, Chan-It W, Khamrin P, Nishimura S, Sugita K, et al. Human  
629 bocavirus infection in children with acute gastroenteritis in Japan and Thailand. *J Med  
630 Virol.* 2011;83(2):286-90.
- 631 76. Carrol ED, Mankhambo LA, Guiver M, Banda DL, Denis B, Dove W, et al. PCR  
632 improves diagnostic yield from lung aspiration in Malawian children with  
633 radiologically confirmed pneumonia. *PLoS One.* 2011;6(6):e21042.
- 634 77. Smuts H, Workman L, Zar HJ. Role of human metapneumovirus, human  
635 coronavirus NL63 and human bocavirus in infants and young children with acute  
636 wheezing. *J Med Virol.* 2008;80(5):906-12.
- 637 78. Li H, He M, Zeng P, Gao Z, Bian G, Yang C, et al. The genomic and seroprevalence  
638 of human bocavirus in healthy Chinese plasma donors and plasma derivatives.  
639 *Transfusion.* 2015;55(1):154-63.
- 640 79. Wang K, Wang W, Yan H, Ren P, Zhang J, Shen J, et al. Correlation between  
641 bocavirus infection and humoral response, and co-infection with other respiratory  
642 viruses in children with acute respiratory infection. *J Clin Virol.* 2010;47(2):148-55.
- 643 80. Martin ET, Taylor J, Kuypers J, Magaret A, Wald A, Zerr D, et al. Detection of  
644 bocavirus in saliva of children with and without respiratory illness. *J Clin Microbiol.*  
645 2009;47(12):4131-2.

- 646 81. Mitui MT, Tabib SM, Matsumoto T, Khanam W, Ahmed S, Mori D, et al.  
647 Detection of human bocavirus in the cerebrospinal fluid of children with encephalitis.  
648 Clin Infect Dis. 2012;54(7):964-7.
- 649 82. Iaconelli M, Divizia M, Della Libera S, Di Bonito P, La Rosa G. Frequent  
650 Detection and Genetic Diversity of Human Bocavirus in Urban Sewage Samples. Food  
651 Environ Virol. 2016;8(4):289-95.
- 652 83. La Rosa G, Purpari G, Guercio A, Di Bella S, Gucciardi F, Proroga YTR, et al.  
653 Detection of Human Bocavirus Species 2 and 3 in Bivalve Shellfish in Italy. Appl  
654 Environ Microbiol. 2018;84(7).
- 655 84. Netshikweta R, Chidamba L, Nadan S, Taylor MB, Page NA. Molecular  
656 epidemiology of human bocavirus infection in hospitalized children with acute  
657 gastroenteritis in South Africa, 2009-2015. J Med Virol. 2020;92(8):1124-32.
- 658 85. Mohammadi M, Armin S, Yazdanpour Z. Human bocavirus infections and co-  
659 infections with respiratory syncytial virus and Rotavirus in children with acute  
660 respiratory or gastrointestinal disease. Braz J Microbiol. 2020;51(1):45-51.
- 661 86. Farahmand M, Moghoofei M, Dorost A, Shoja Z, Ghorbani S, Kiani SJ, et al.  
662 Global prevalence and genotype distribution of norovirus infection in children with  
663 gastroenteritis: A meta-analysis on 6 years of research from 2015 to 2020. Rev Med  
664 Virol. 2021:e2237.
- 665 87. Shioda K, Kambhampati A, Hall AJ, Lopman BA. Global age distribution of  
666 pediatric norovirus cases. Vaccine. 2015;33(33):4065-8.
- 667 88. Nordgren J, Svensson L. Genetic Susceptibility to Human Norovirus Infection: An  
668 Update. Viruses. 2019;11(3).
- 669 89. Hickman D, Jones MK, Zhu S, Kirkpatrick E, Ostrov DA, Wang X, et al. The effect  
670 of malnutrition on norovirus infection. mBio. 2014;5(2):e01032-13.
- 671 90. Taneja V. Sex Hormones Determine Immune Response. Front Immunol.  
672 2018;9:1931.
- 673 91. Tymentsev A, Tikunov A, Zhirakovskaia E, Kurilshchikov A, Babkin I, Klemesheva  
674 V, et al. Human bocavirus in hospitalized children with acute gastroenteritis in Russia  
675 from 2010 to 2012. Infect Genet Evol. 2016;37:143-9.

- 676 92. Ong DS, Schuurman R, Heikens E. Human bocavirus in stool: A true pathogen or  
677 an innocent bystander? *J Clin Virol.* 2016;74:45-9.
- 678 93. Martin ET, Kuypers J, McRoberts JP, Englund JA, Zerr DM. Human Bocavirus 1  
679 Primary Infection and Shedding in Infants. *J Infect Dis.* 2015;212(4):516-24.
- 680 94. Martin ET, Fairchok MP, Kuypers J, Magaret A, Zerr DM, Wald A, et al. Frequent  
681 and prolonged shedding of bocavirus in young children attending daycare. *J Infect Dis.*  
682 2010;201(11):1625-32.
- 683 95. Yu JM, Li DD, Xu ZQ, Cheng WX, Zhang Q, Li HY, et al. Human bocavirus  
684 infection in children hospitalized with acute gastroenteritis in China. *J Clin Virol.*  
685 2008;42(3):280-5.
- 686 96. Brieu N, Guyon G, Rodière M, Segondy M, Foulongne V. Human bocavirus  
687 infection in children with respiratory tract disease. *Pediatr Infect Dis J.*  
688 2008;27(11):969-73.
- 689
